# Supplementary material for: A Branched Rutile/Anatase Phase Structure Electrode with Enhanced Electron-Hole Separation for High-Performance Photoelectrochemical DNA Biosensor
Source: MDPI journal article supplement (doi:10.3390/bios13070714), 2023-07-07
Supplement: s1 [file s1]

# A Branched Rutile/Anatase Phase Structure Electrode with Enhanced Electron-Hole Separation for High-Performance Photoelectrochemical DNA Biosensor

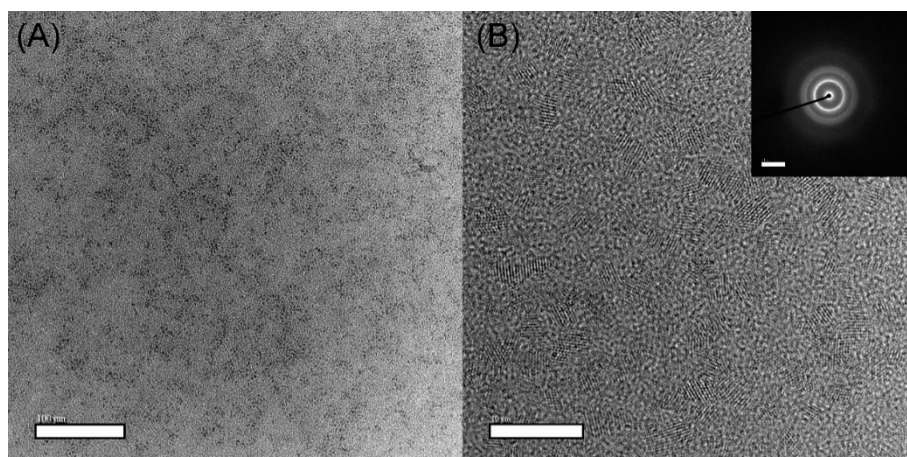

**Figure S1.** (A, B, inset) TEM image and SEAD of CdTe QDs

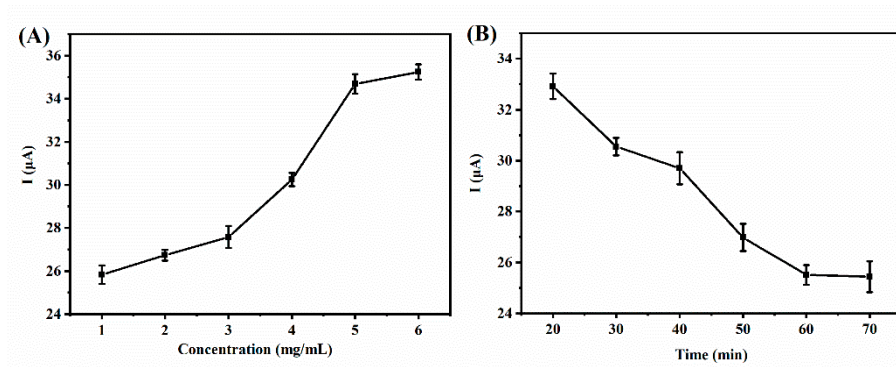

**Figure S2.** (A) Effect of concentration of CdTe QDs and (B) incubation time with target DNA on the photocurrent response

**Table S1.** Analytical results of target DNA in human serum samples using the proposed method

| Human serum | Cadded (pM) | Cfound (pM) | RSD% (n=3) | Recovery (%) |
|-------------|-------------|-------------|------------|--------------|
| Sample 1    | 1           | 0.9418      | 2.6        | 95.18        |
| Sample 2    | 10          | 9.821       | 3.9        | 96.21        |
| Sample 3    | 100         | 100.42      | 3.5        | 100.64       |
